# Supplementary material for: Synthesis of functionalized tetrahydrofuran derivatives from 2,5-dimethylfuran through cascade reactions
Source: Royal Society of Chemistry journal article supplement (doi:10.1039/c9gc01060b), 2019-01-01
Supplement: c9gc01060b1.pdf [file c9gc01060b1.pdf]

## *Supporting Information*

### **Synthesis of functionalized tetrahydrofuran derivatives from 2,5-dimethylfuran through cascade reactions**

J. Li,<sup>a,b</sup> E. Muller,<sup>c</sup> M. Pera-Titus,<sup>b\*</sup>, F. Jérôme,<sup>a</sup> and K. De Oliveira Vigier<sup>a\*</sup>

<sup>a</sup> IC2MP UMR 7285 CNRS-Université de Poitiers-ENSIP, 1 rue Marcel Doré, TSA 41195, 86073 Poitiers Cedex 9, France, email: [karine.vigier@univ-poitiers.fr](mailto:karine.vigier@univ-poitiers.fr)

<sup>b</sup> Eco-Efficient Products and Processes Laboratory (E2P2L), UMI 3464 CNRS-Solvay, 3966 Jin Du Road, Xin Zhuang Ind. Zone, 201108 Shanghai, China, email: [marc.pera-titus-ext@solvay.com](mailto:marc.pera-titus-ext@solvay.com)

<sup>c</sup> SOLVAY-Advanced Organic Chemistry & Molecule Design Laboratory, Recherche & Innovation Centre de Lyon, 85 Avenue des Frères Perret, 69192 Saint-Fons, France

#### Outline:

|                                                                                 |   |
|---------------------------------------------------------------------------------|---|
| 1. Thermodynamic calculations .....                                             | 2 |
| 2. IR spectroscopy analysis of A26 .....                                        | 2 |
| 3. TGA analysis .....                                                           | 3 |
| 4. XPS analysis .....                                                           | 5 |
| 5. <sup>1</sup> H and <sup>13</sup> C NMR spectra of products of interest ..... | 7 |

## 1. Thermodynamic calculations

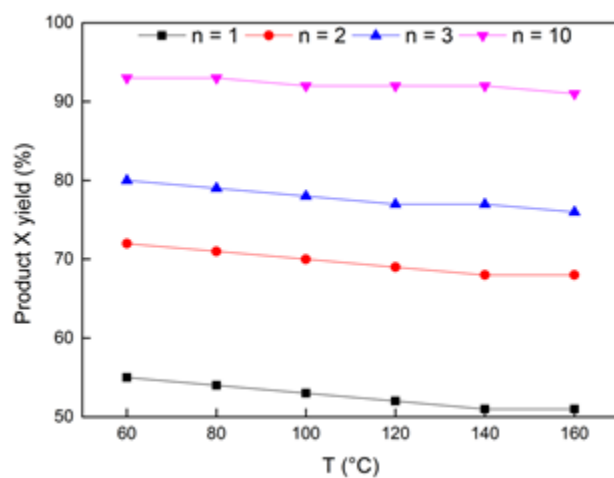

**Fig S1. Equilibrium product yields as a function of temperature for different equivalents of benzaldehyde (calculations).**

## 2. IR spectroscopy analysis of A26.

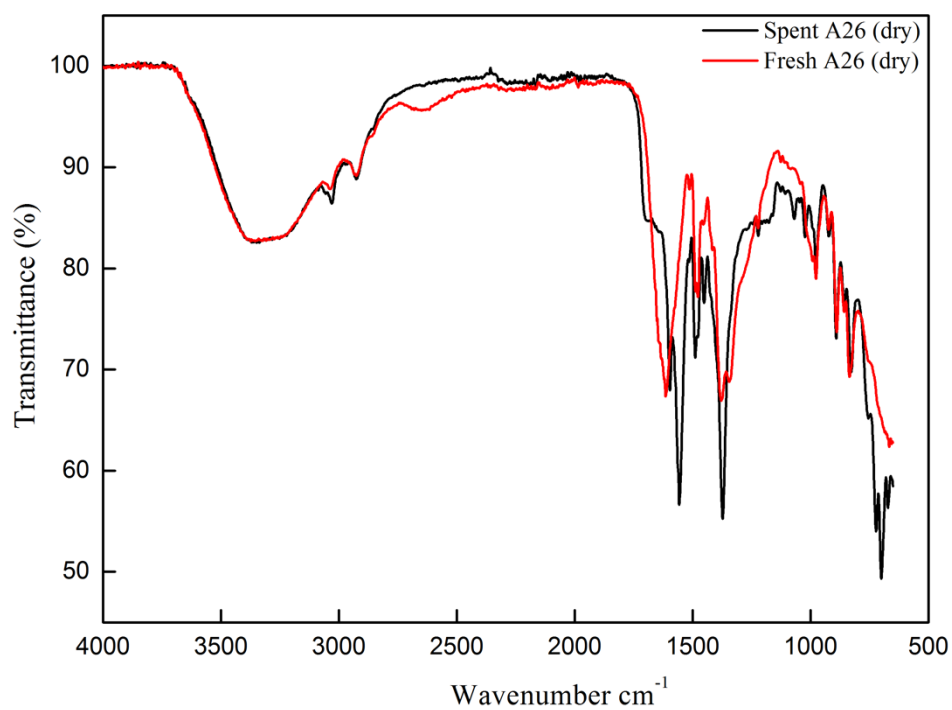

**Fig S2. FT-IR spectroscopy of the fresh A26 (dry) and the spent A26 (dry).**

### 3. TGA analysis

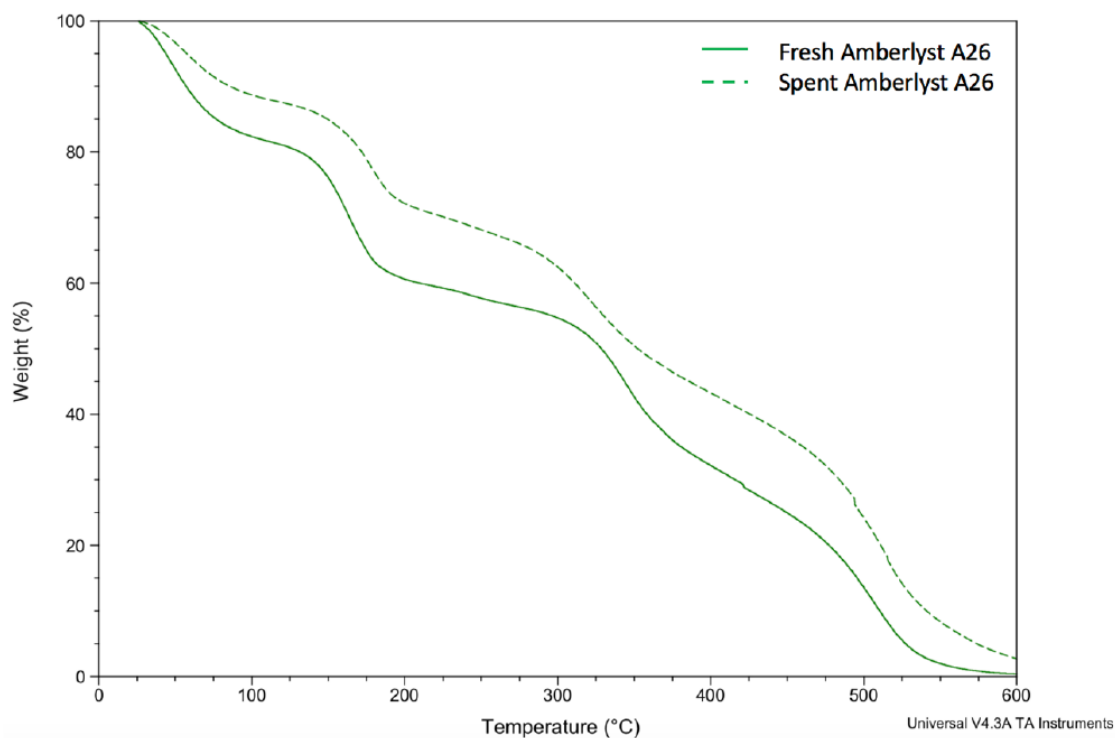

**Fig S3. TGA analysis of fresh and spent A26 catalyst.**

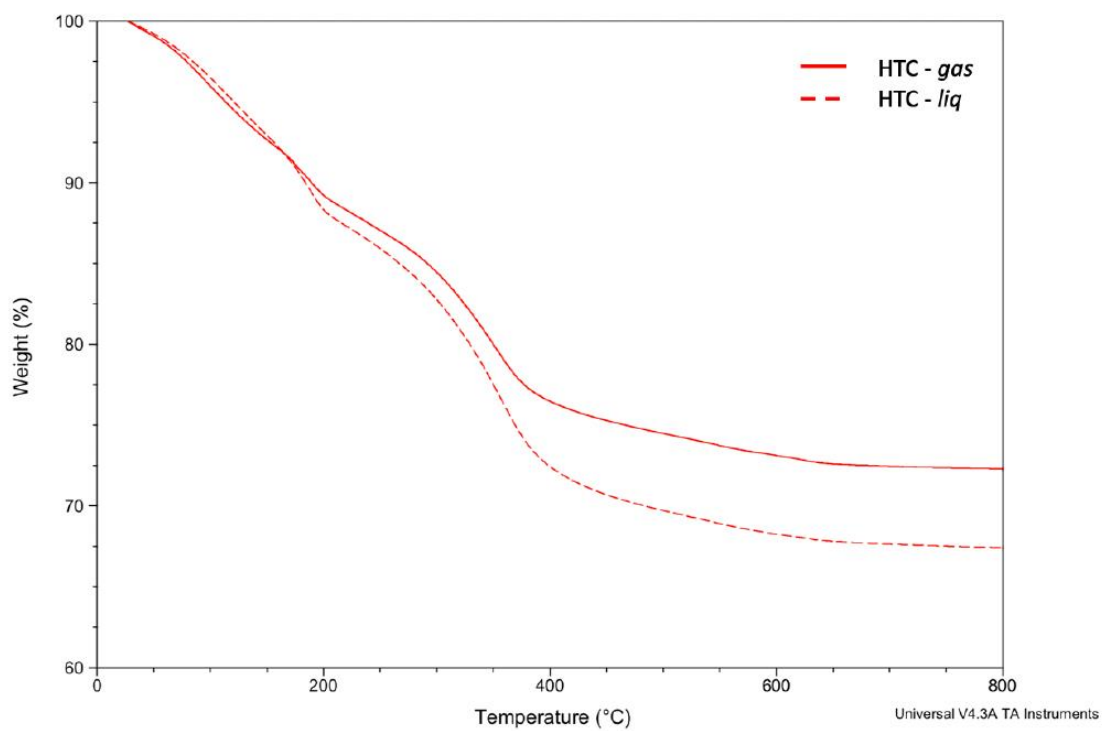

**Fig S4. TGA analysis of fresh HTC-gas and HTC-liq catalysts.**

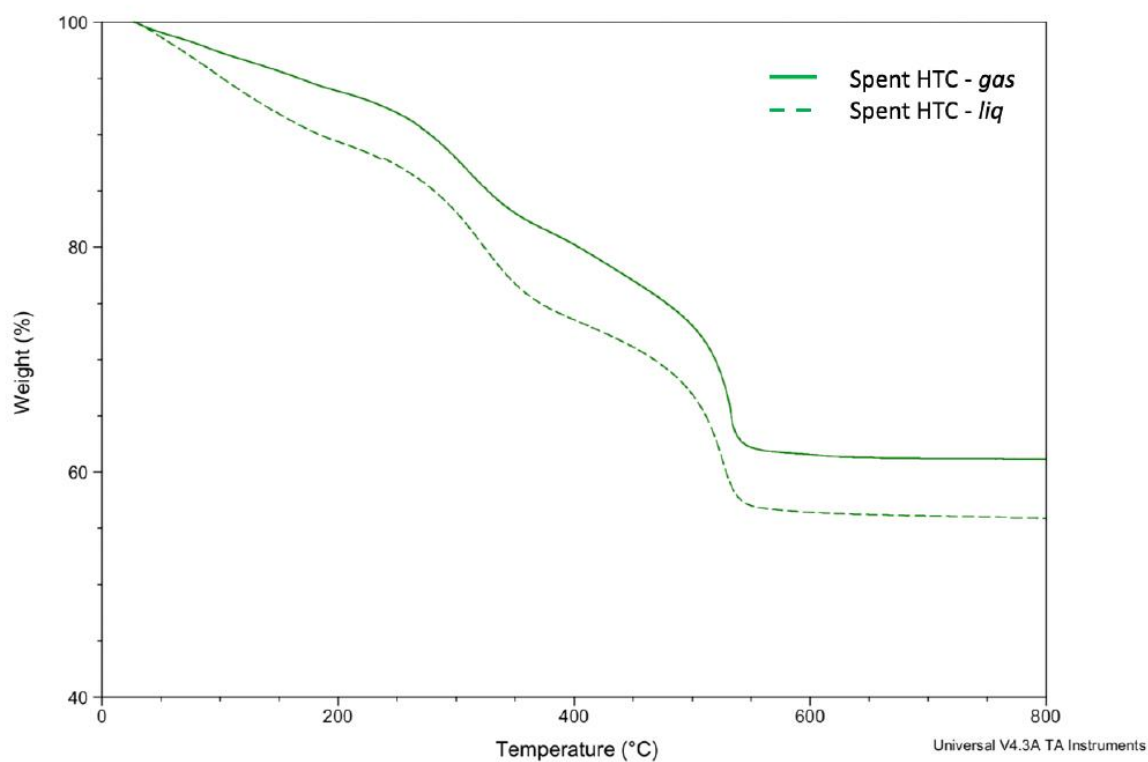

**Fig S5. TGA analysis of HTC-gas and HTC-liq catalysts after reaction.**

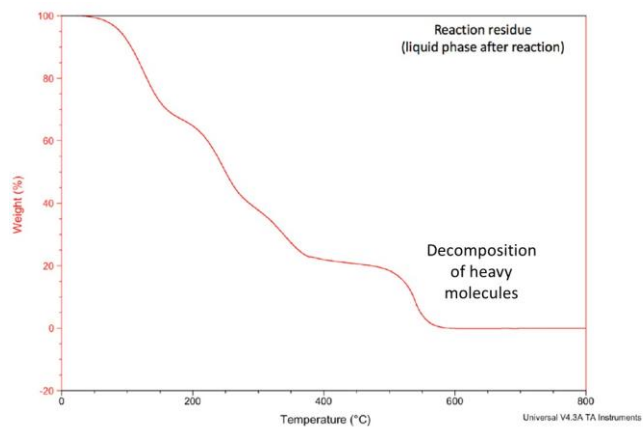

**Fig S6. TGA analysis of the reaction media after catalytic run in the presence of HTC.**

## 4. XPS analysis

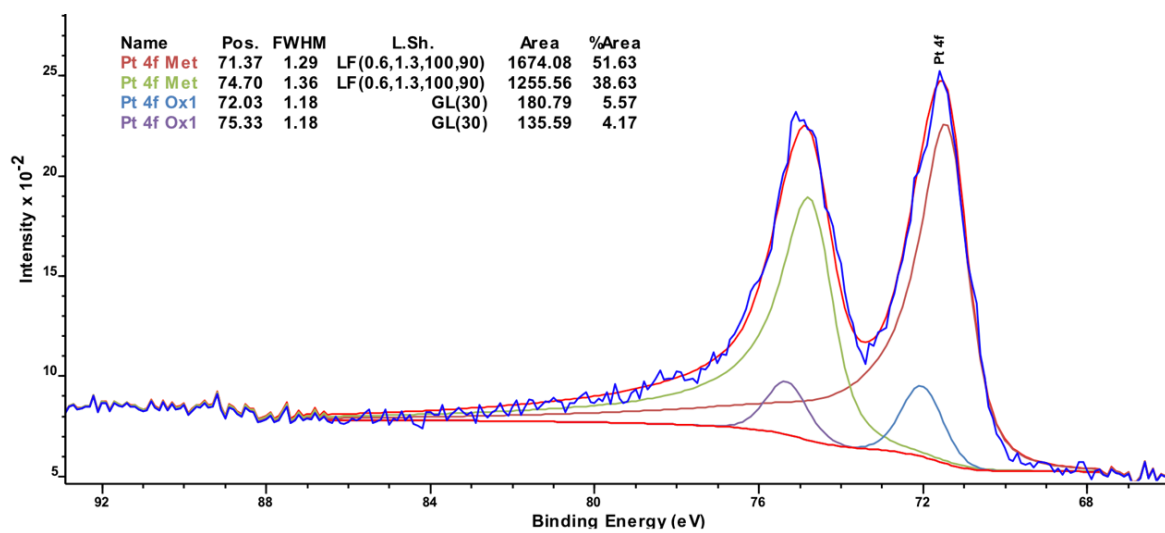

Figure S7. XPS analysis of the spent Pt/C after the 5<sup>th</sup> run.

**Table S1:** XPS analysis of spent and fresh catalyst

| Element | Eb     | RSF   | Pt/C (Fresh) | Pt/C (After 5 runs) |
|---------|--------|-------|--------------|---------------------|
| C1s     | 284.4  | 0.28  | 91.6         | 87                  |
| O1s     | 532    | 0.78  | 7.8          | 10.5                |
| Pt4f    | 71     | 5.58  | 0.6          | 0.4                 |
| S2p     | 168    | 0.668 |              | 1.5                 |
| N1s     | 400    | 0.477 |              | 0.6                 |
| Ca2p    | traces |       |              |                     |

Eb: Binding Energy  
RSF: Relative Sensitivity Factor

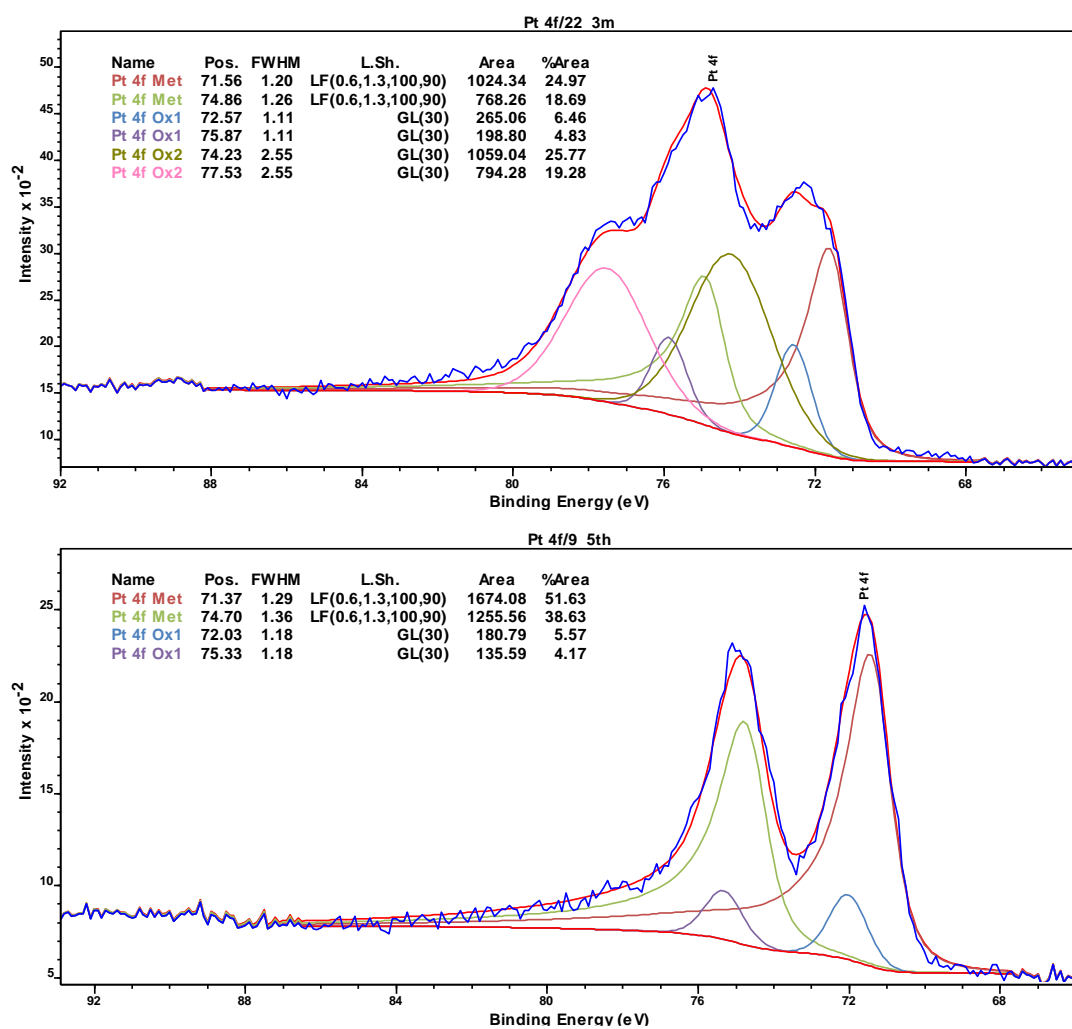

**Fig S8.** Deconvolution for Pt for fresh catalyst (up) and spent catalyst (down)

5.  $^1\text{H}$  and  $^{13}\text{C}$  NMR spectra of products of interest.

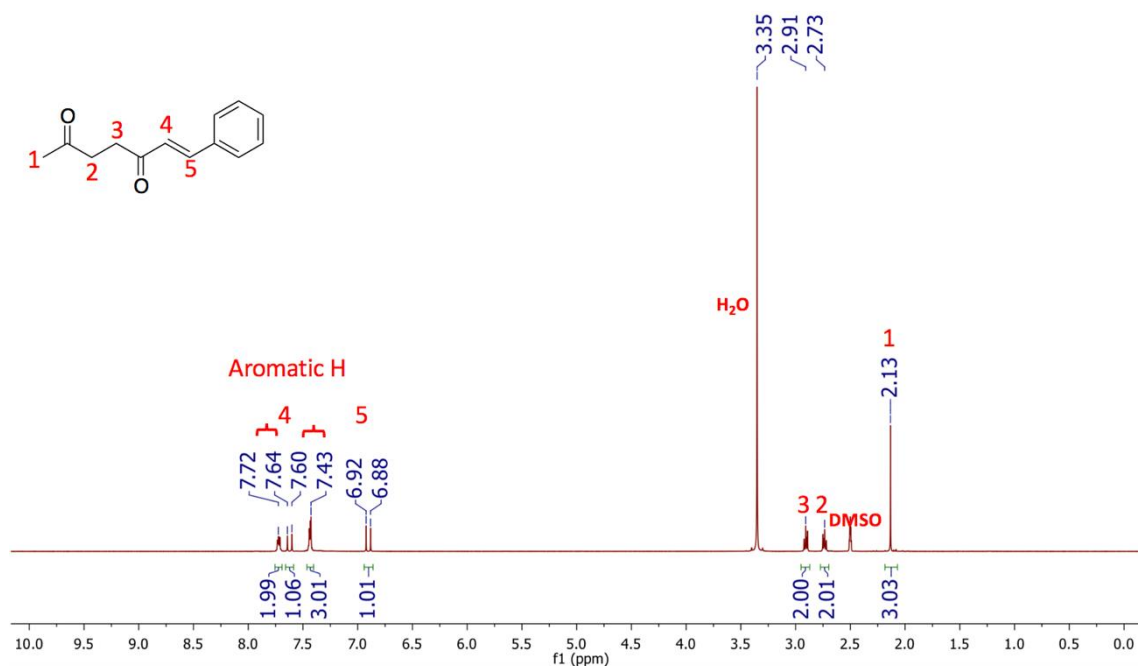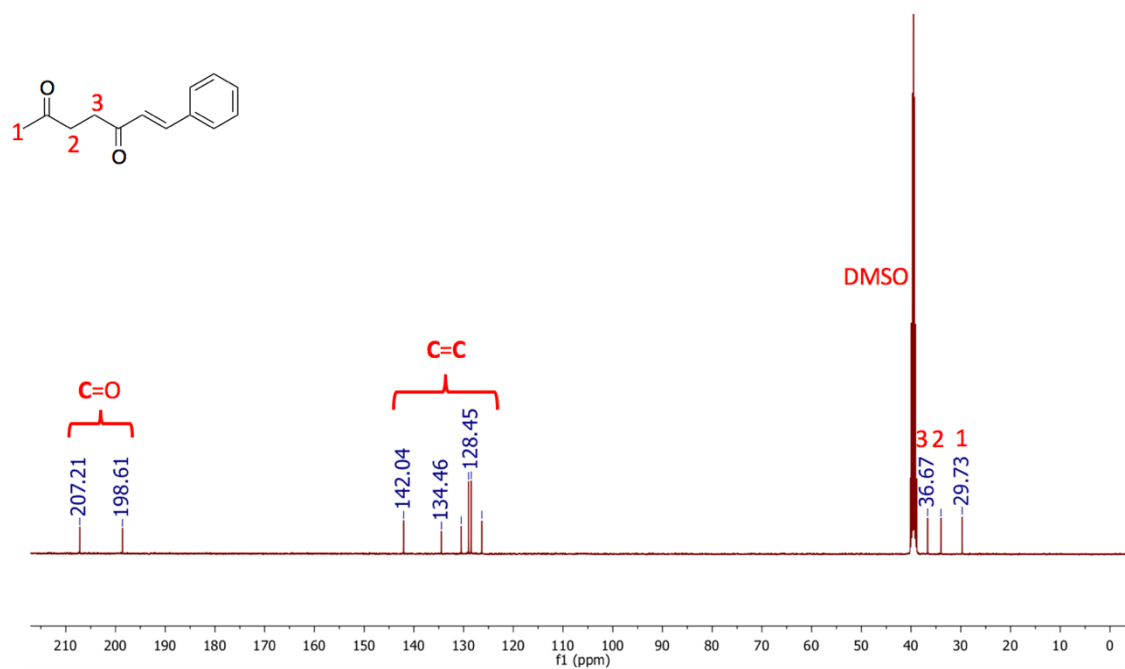

**7-Phenylhept-6-ene-2,5-dione**  $^1\text{H}$  NMR (300 MHz, DMSO- $d_6$ )  $\delta$  = 7.72 (m, 2H, Ar), 7.64-7.60 (d,  $J$  = 16, 1H), 7.43 (m, 3H, Ar), 6.92-6.88 (d,  $J$  = 16, 1H), 2.91 (t, 2H), 2.73 (t, 2H), 2.13 (s, 3H).  $^{13}\text{C}$  NMR (75 MHz, DMSO- $d_6$ )  $\delta$  = 207.21, 198.61, 142.04, 134.46, 130.47, 128.99, 128.45, 126.32, 36.67, 34.02, 29.73.

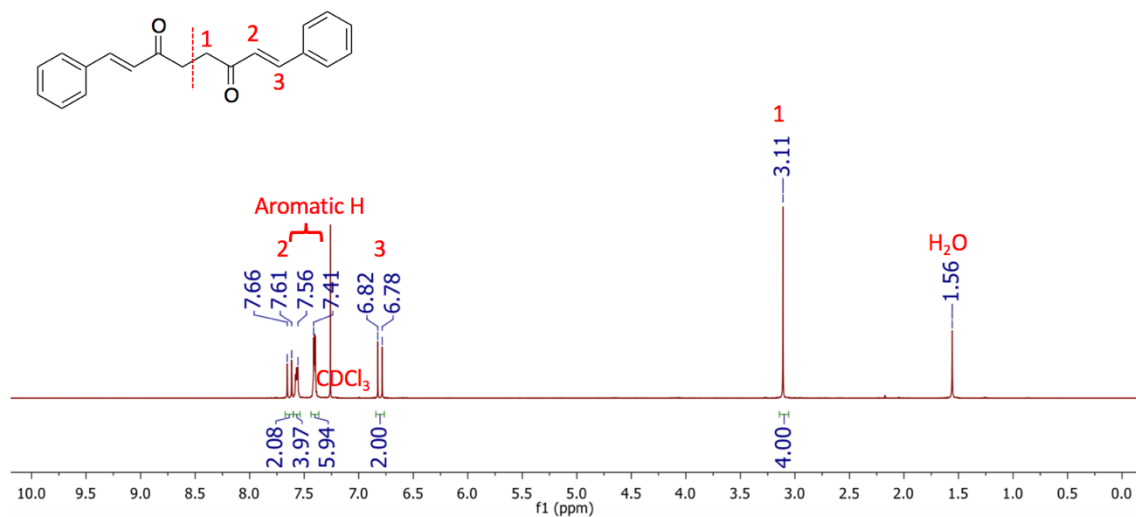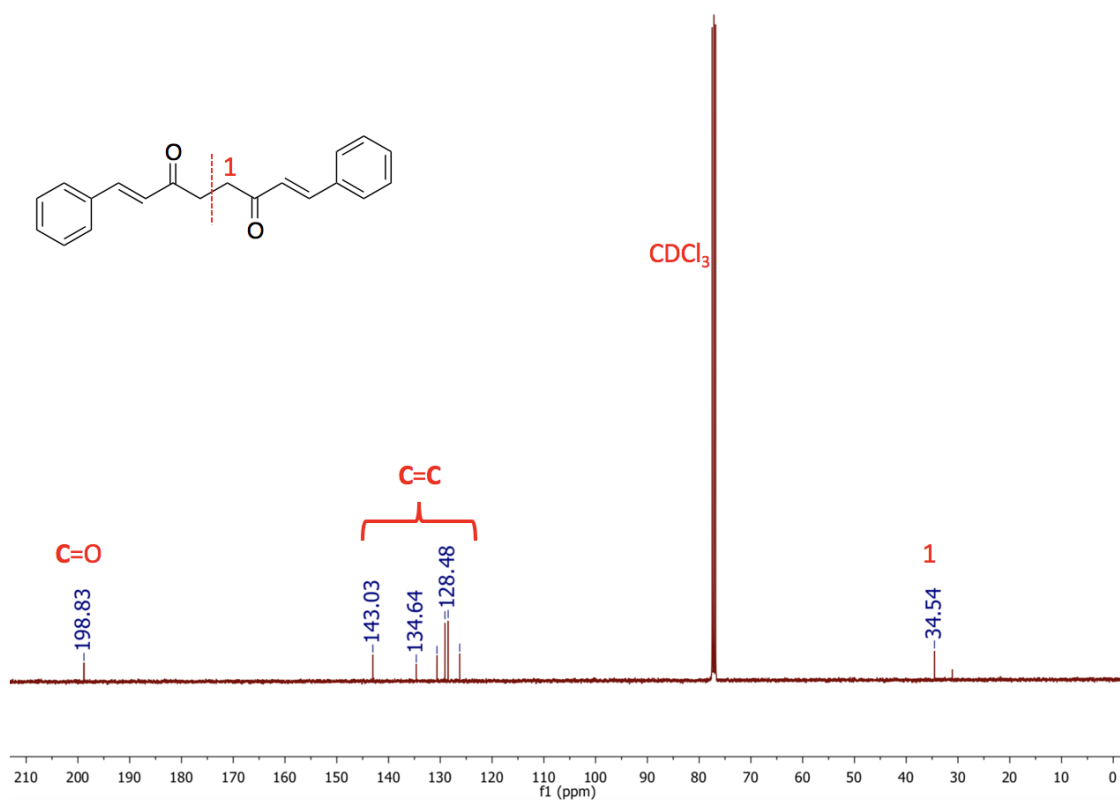

**1,8-Diphenylocta-1,7-diene-3,6-dione**  $^1\text{H}$  NMR (300MHz,  $\text{CDCl}_3$ )  $\delta$  = 7.66-7.61 (d, J = 20, 2H), 7.56 (m, 4H, Ar), 7.41 (m, 6H, Ar), 6.82-6.78 (d, J = 16, 2H), 3.11 (s, 4H).  $^{13}\text{C}$  NMR (75MHz,  $\text{CDCl}_3$ )  $\delta$  = 198.83, 143.03, 134.64, 130.65, 129.10, 128.48, 126.25, 34.54.



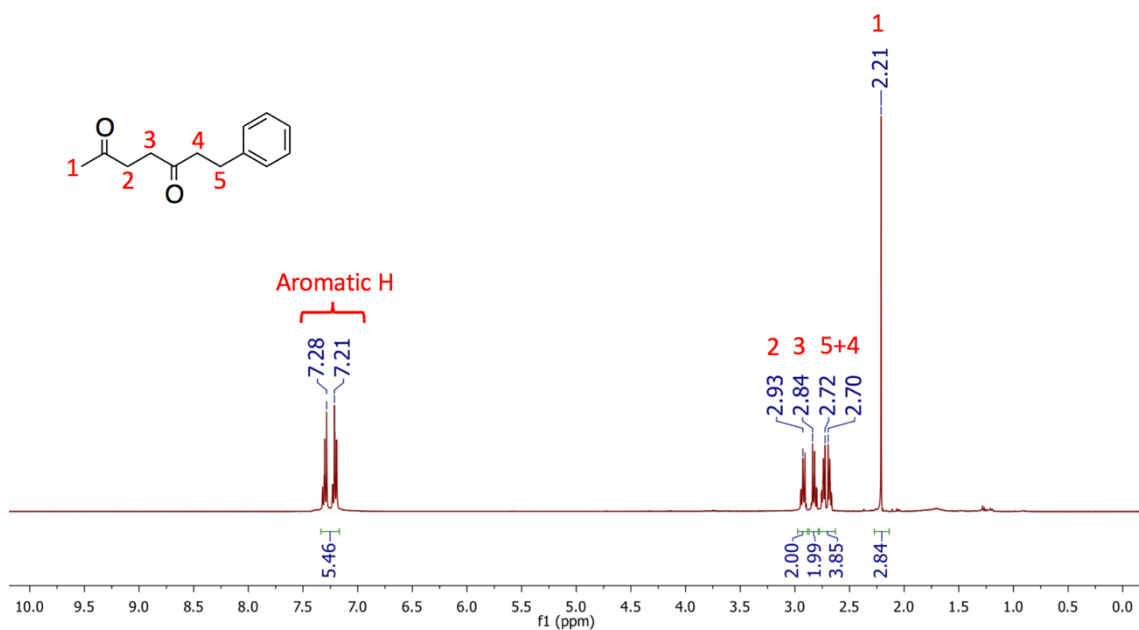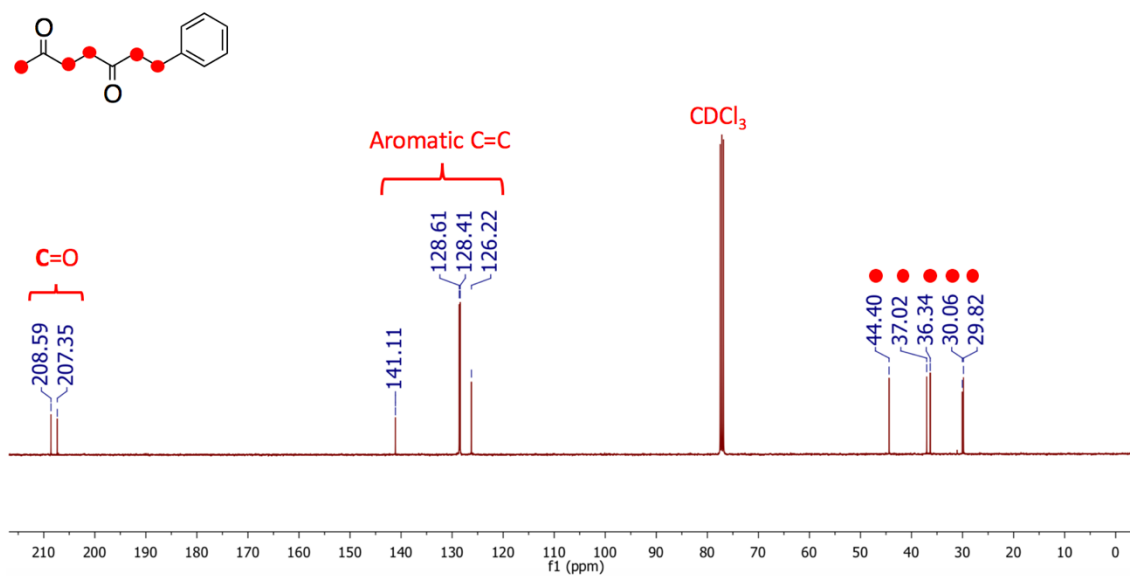

**7-Phenylheptane-2,5-dione** <sup>1</sup>H NMR (300MHz, CDCl<sub>3</sub>) δ = 7.28-7.21 (m, 5H, Ar), 2.93 (t, 2H), 2.82 (t, 2H), 2.72-2.70 (m, 4H), 2.21 (s, 3H). <sup>13</sup>C NMR (75MHz, CDCl<sub>3</sub>) δ = 208.59, 207.35, 141.11, 128.61, 128.41, 126.22, 44.40, 37.02, 36.34, 30.06, 29.82.

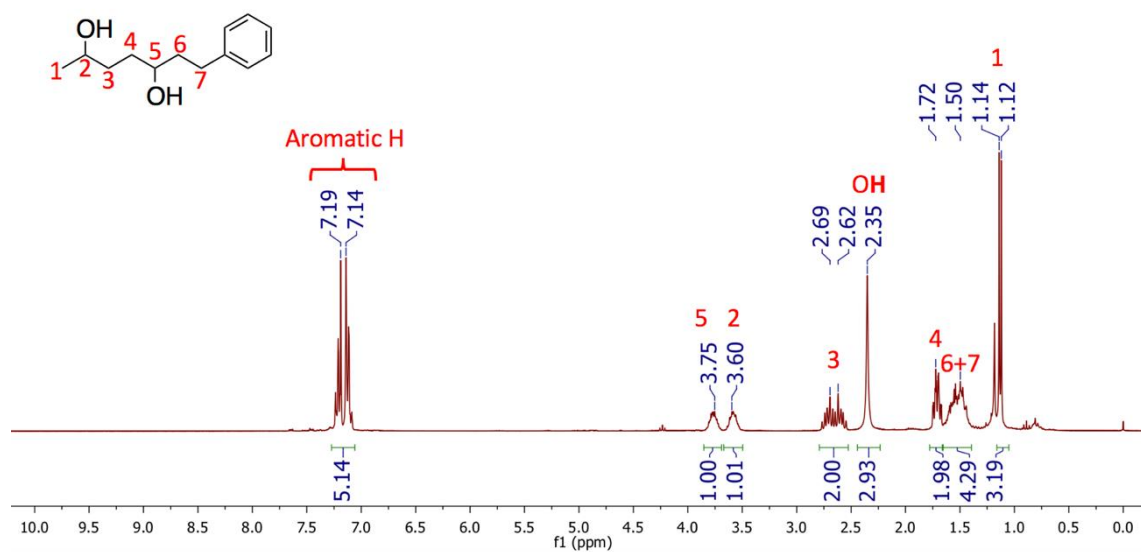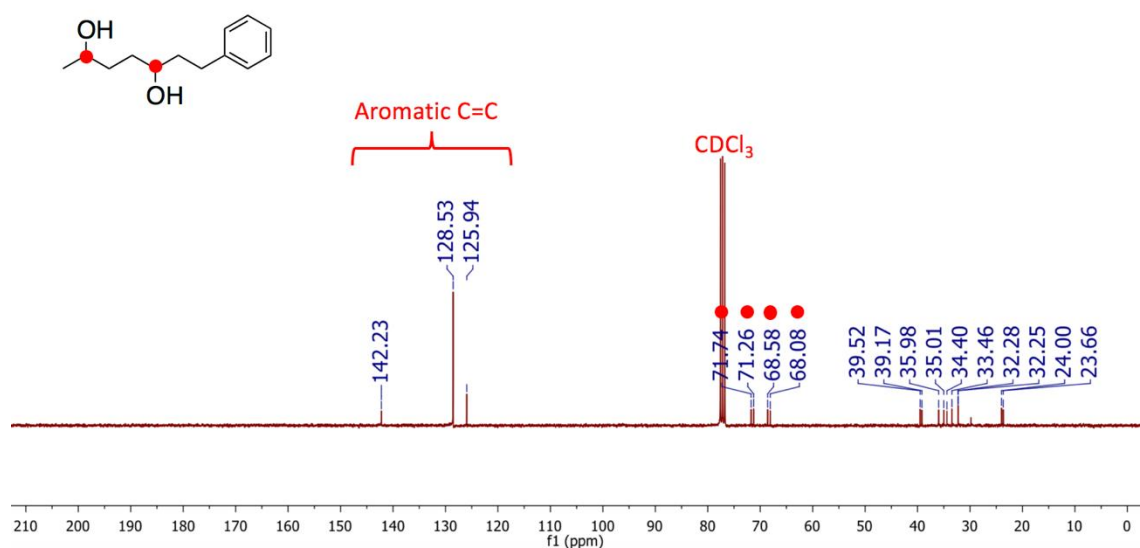

**7-Phenylheptane-2,5-diol** <sup>1</sup>H NMR (300MHz, CDCl<sub>3</sub>): δ = 7.19-7.14 (m, 5H, Ar), 3.75 (m, 1H), 3.60 (m, 1H), 2.69-2.62 (m, 2H), 1.72 (m, 2H), 1.50 (m, 4H), 1.14-1.12 (d, 3H). <sup>13</sup>C NMR (75MHz, CDCl<sub>3</sub>) δ = 142.23, 128.53, 125.94, 71.74, 71.26, 68.58, 68.08, 39.52, 39.17, 35.98, 35.01, 34.40, 33.46, 32.28, 32.25, 24.00, 23.66.

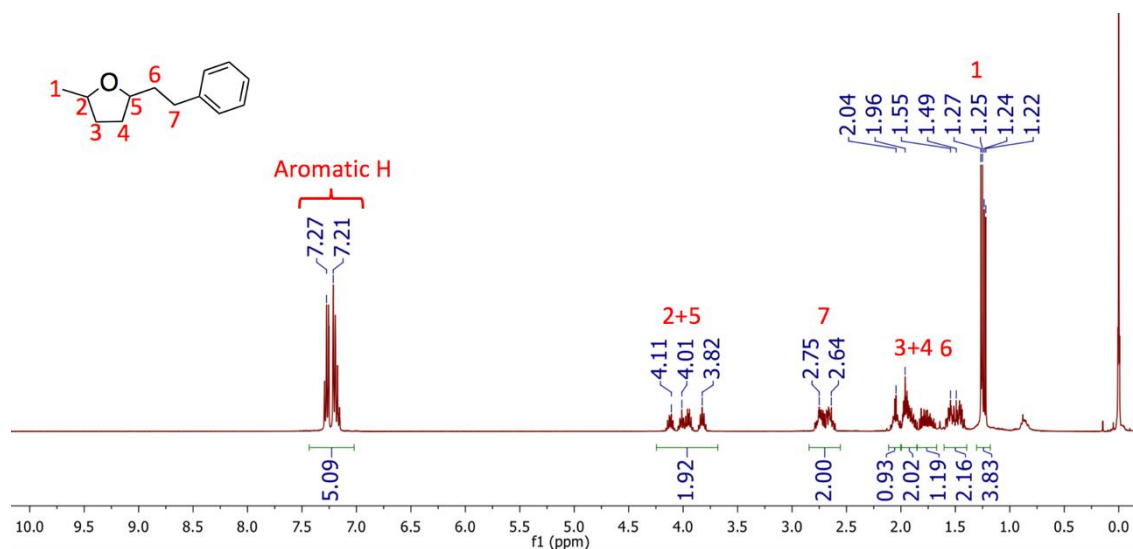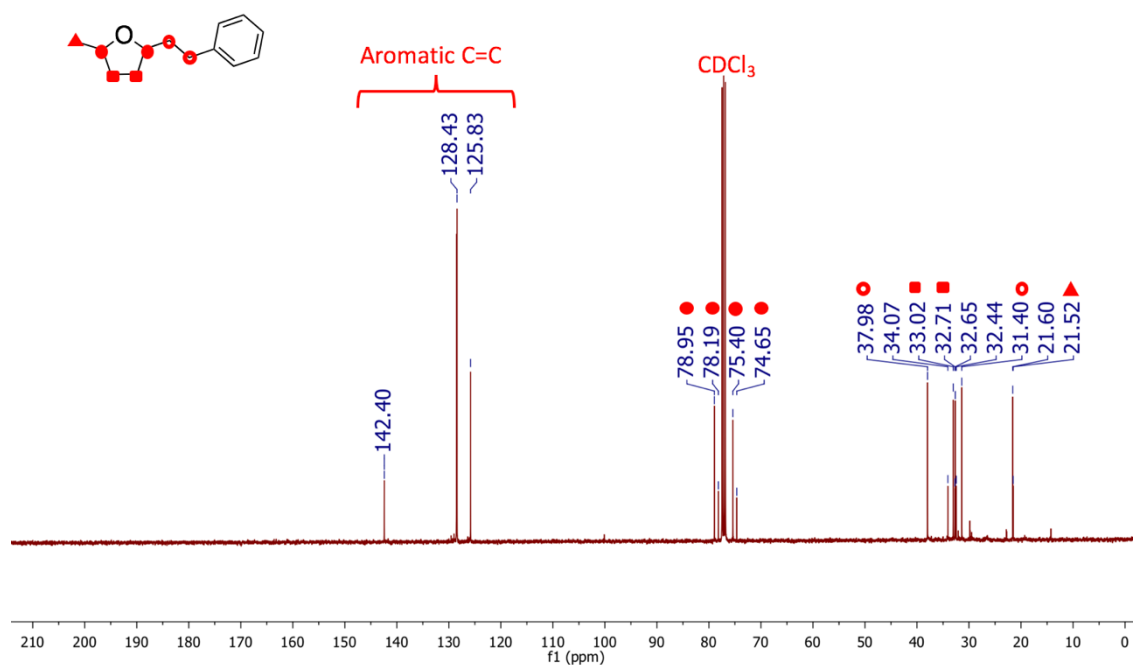

**2-Methyl-5-phenethyltetrahydrofuran** <sup>1</sup>H NMR (300MHz, CDCl<sub>3</sub>) δ = 7.27-7.21 (m, 5H, Ar), 4.11-3.82 (m, 2H), 2.75-2.64 (m, 2H), 2.04-1.78 (m, 4H), 1.55-1.49 (m, 2H), 1.27-1.22 (d, d, 3H). <sup>13</sup>C NMR (75MHz, CDCl<sub>3</sub>) δ = 142.40, 128.43, 125.83, 78.95, 78.19, 75.40, 74.65, 37.98, 34.07, 33.02, 32.71, 32.65, 32.44, 31.40, 21.60, 21.52.

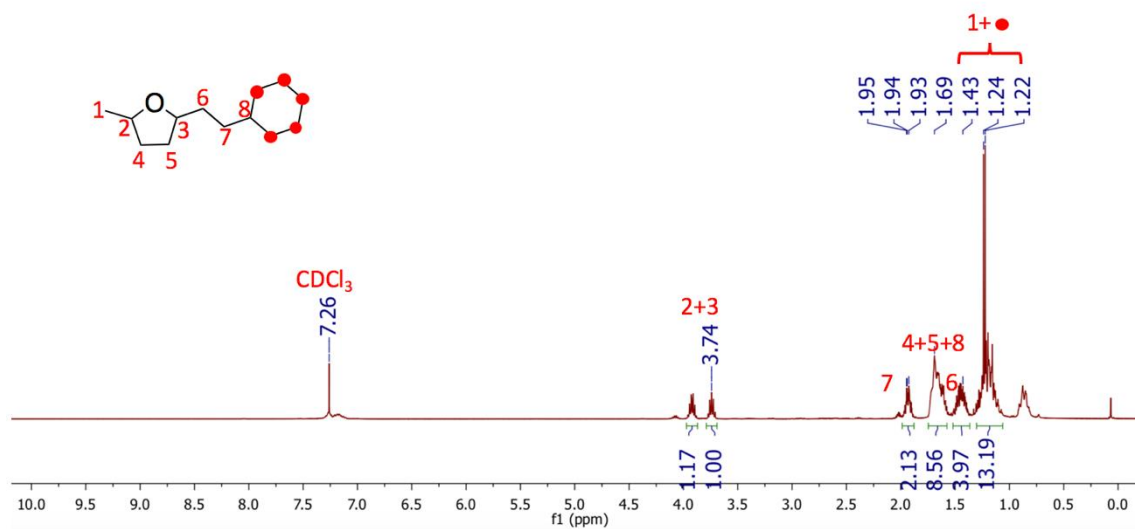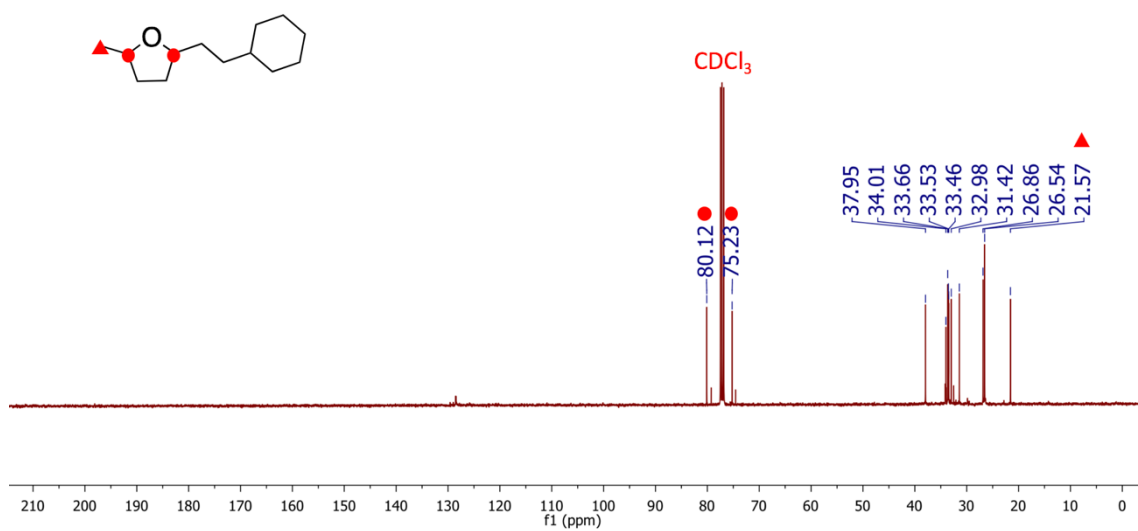

**2-(2-Cyclohexylethyl)-5-methyltetrahydrofuran** <sup>1</sup>H NMR (300MHz, CDCl<sub>3</sub>): δ = 3.93 (m, 1H), 3.74 (m, 1H), 1.94 (m, 2H), 1.69 (m, 5H), 1.43 (m, 4H), 1.24-1.22 (d, 3H), 1.20 (m, 10H).  
<sup>13</sup>C NMR (75MHz, CDCl<sub>3</sub>): δ = 80.12, 75.23, 37.95, 34.01, 33.66, 33.53, 33.46, 32.98, 31.42, 26.86, 26.54, 21.57.
